# Supplementary material for: Association of extracerebral organ failure with 1-year survival and healthcare-associated costs after cardiac arrest: an observational database study
Source: Springer Nature journal article supplement (doi:10.1186/s13054-019-2359-z), 2019-02-28
Supplement: MOESM1 [file 16517686]

ADDITIONAL TABLE A: Characteristics of the nested cohort study population

|                                               | All<br>N = 1324 | OHCA<br>Survivors<br>N = 463 | OHCA<br>Non-survivors<br>N = 309 | IHCA<br>Survivors<br>N = 228 | IHCA<br>Non-survivors<br>N = 324 |
|-----------------------------------------------|-----------------|------------------------------|----------------------------------|------------------------------|----------------------------------|
| Age (years)                                   | 63 (54-71)      | 60 (50-68)                   | 64 (56-73)                       | 64 (52-71)                   | 66 (58-75)                       |
| Gender (male)                                 | 73%             | 77%                          | 77%                              | 67%                          | 67%                              |
| Physical status<br>(independent) <sup>1</sup> | 91%             | 97%                          | 92%                              | 92%                          | 82%                              |
| ROSC delay<br>(min) <sup>2</sup>              | 15 (9-22)       | 17 (12-23)                   | 22 (17-27)                       | 5 (2-10)                     | 10 (4-15)                        |
| Shockable <sup>3</sup>                        | 60%             | 84%                          | 62%                              | 47%                          | 28%                              |
| Witnessed <sup>4</sup>                        | 90%             | 90%                          | 85%                              | 97%                          | 89%                              |
| 24h-EC-SOFA                                   | 7 (6-9)         | 6 (5-7)                      | 7 (6-8)                          | 7 (6-10)                     | 9 (7-11)                         |
| 24h-SOFA                                      | 9 (7-11)        | 7 (6-9)                      | 10 (7-11)                        | 9 (7-11)                     | 11 (8-13)                        |
| Poor outcome<br>(CPC 3-5) <sup>5</sup>        | 55%             | 7.4%                         | 100%                             | 13%                          | 100%                             |
| One-year<br>mortality                         | 48%             | 0%                           | 100%                             | 0%                           | 100%                             |
| One-year costs<br>(€1000)                     | 32 (14-63)      | 48 (30-72)                   | 13 (8.0-24)                      | 62 (32-110)                  | 19 (11-41)                       |
| Cost per day<br>alive (€)                     | 400 (130-2500)  | 130 (83-200)                 | 2500 (1400-<br>3800)             | 170 (89-310)                 | 2700 (1500-<br>4400)             |

<sup>1</sup>Simplified WHO/ECOG-classification before cardiac arrest; <sup>2</sup>ROSC delay, time from collapse to return of spontaneous circulation; <sup>3</sup>Shockable, initial cardiac rhythm during resuscitation shockable (ventricular fibrillation/tachycardia); <sup>4</sup>Witnessed, collapse witnessed; <sup>5</sup>Poor outcome, poor neurologic outcome one year after cardiac arrest (CPC 3-5)
