# Supplementary material for: Association of extracerebral organ failure with 1-year survival and healthcare-associated costs after cardiac arrest: an observational database study
Source: Springer Nature journal article supplement (doi:10.1186/s13054-019-2359-z), 2019-02-28
Supplement: MOESM2 [file 16517686]

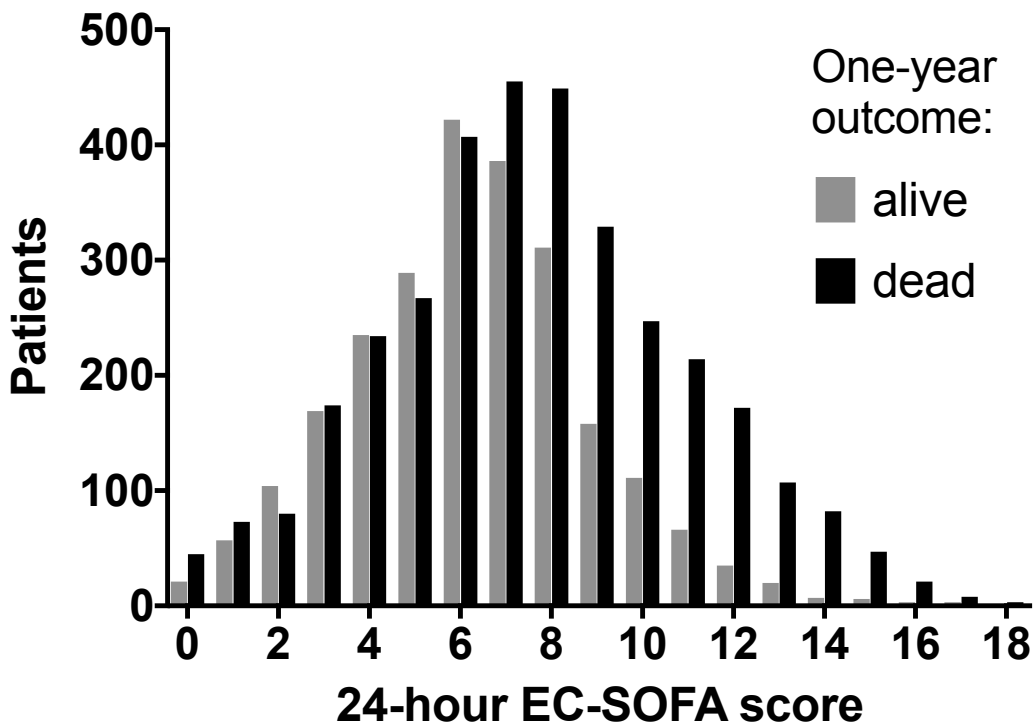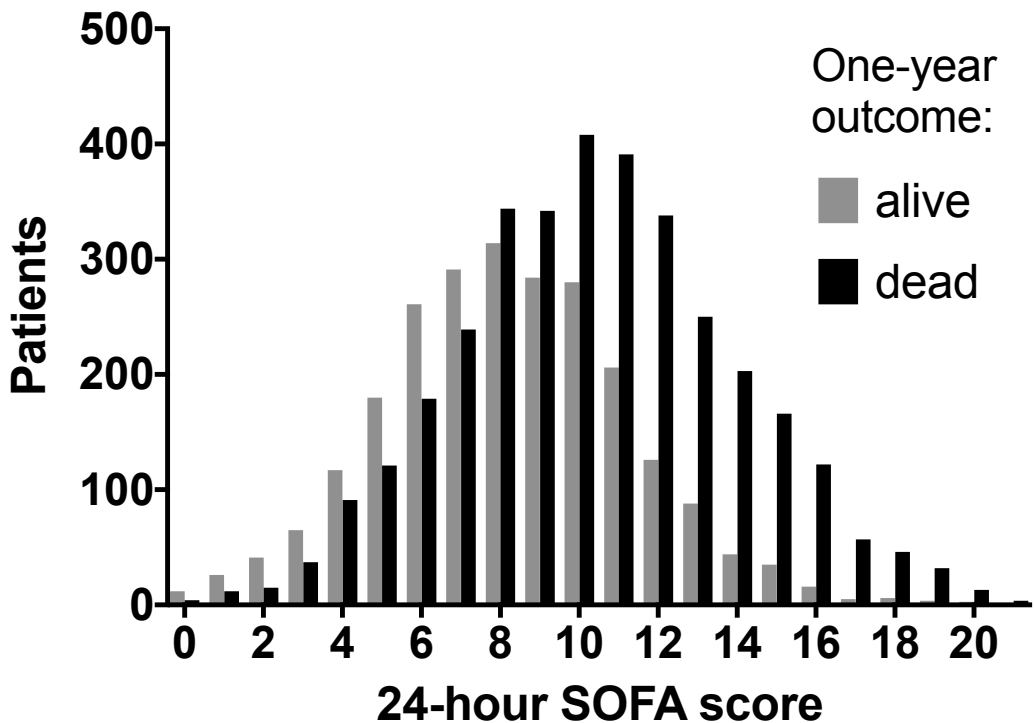

Additional Figure A. Distribution of 24h-EC-SOFA score (upper panel) and 24h-SOFA score (full score including CNS-sub-score; lower panel) in one-year outcome groups. Grey bars, one-year survivors after cardiac arrest; black bars, one-year non-survivors after cardiac arrest.
