# Supplementary material for: Association of extracerebral organ failure with 1-year survival and healthcare-associated costs after cardiac arrest: an observational database study
Source: Springer Nature journal article supplement (doi:10.1186/s13054-019-2359-z), 2019-02-28
Supplement: MOESM3 [file 16517686]

## One-year survival

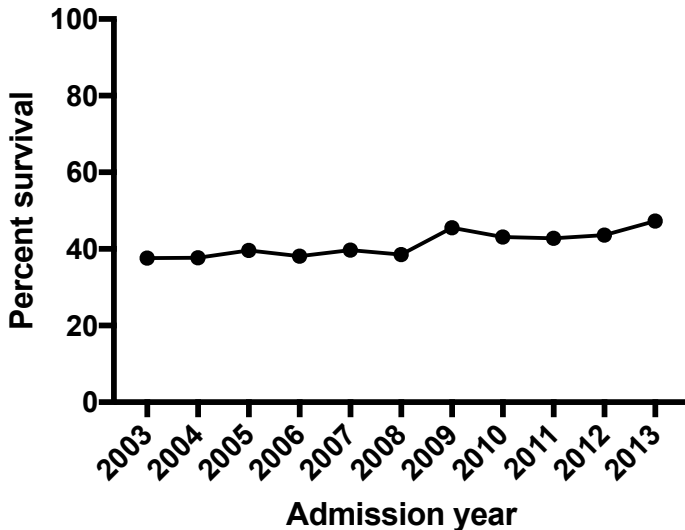

Additional Figure B: One-year survival of cardiac arrest patients stratified by admission year in the full data.
