# Supplementary material for: Association of extracerebral organ failure with 1-year survival and healthcare-associated costs after cardiac arrest: an observational database study
Source: Springer Nature journal article supplement (doi:10.1186/s13054-019-2359-z), 2019-02-28
Supplement: MOESM4 [file 16517686]

ADDITIONAL TABLE B: Logistic regression of the association of the full 24h-SOFA score (including neurologic sub-score) with one-year outcome

|                                          | Full Data          |        |        |        | Nested cohort      |        |        |                                      |      |        |        |        |
|------------------------------------------|--------------------|--------|--------|--------|--------------------|--------|--------|--------------------------------------|------|--------|--------|--------|
|                                          | One-year mortality |        |        |        | One-year mortality |        |        | Poor neurologic outcome <sup>1</sup> |      |        |        |        |
|                                          | OR                 | 95% CI |        | P      | OR                 | 95% CI |        | P                                    | OR   | 95% CI |        | P      |
| Age (year)                               | 1.02               | 1.01   | - 1.02 | < 0.01 | 1.03               | 1.02   | - 1.04 | < 0.01                               | 1.03 | 1.02   | - 1.04 | < 0.01 |
| Physical status (dependent) <sup>2</sup> | 2.54               | 2.12   | - 3.03 | < 0.01 | 2.57               | 1.49   | - 4.45 | < 0.01                               | 3.24 | 1.76   | - 5.96 | < 0.01 |
| Not shockable <sup>3</sup>               |                    |        |        |        | 2.72               | 1.98   | - 3.75 | < 0.01                               | 2.93 | 2.10   | - 4.08 | < 0.01 |
| ROSC (min) <sup>4</sup>                  |                    |        |        |        | 1.05               | 1.03   | - 1.06 | < 0.01                               | 1.04 | 1.03   | - 1.06 | < 0.01 |
| Not witnessed <sup>5</sup>               |                    |        |        |        | 1.66               | 1.15   | - 2.63 | 0.03                                 | 1.70 | 1.05   | - 2.77 | 0.03   |
| 24h-SOFA (point)                         | 1.22               | 1.20   | - 1.24 | < 0.01 | 1.22               | 1.16   | - 1.28 | < 0.01                               | 1.19 | 1.14   | - 1.25 | < 0.01 |

<sup>1</sup>Cerebral Performance Category (CPC) 3-5 one year after cardiac arrest; <sup>2</sup>Simplified WHO/ECOG-classification before cardiac arrest; <sup>3</sup>Not shockable, initial cardiac rhythm during resuscitation not shockable (asystole/pulseless electrical activity); <sup>4</sup>ROSC delay, time from collapse to return of spontaneous circulation; <sup>5</sup>Not witnessed, collapse not witnessed
