# Supplementary material for: Association of extracerebral organ failure with 1-year survival and healthcare-associated costs after cardiac arrest: an observational database study
Source: Springer Nature journal article supplement (doi:10.1186/s13054-019-2359-z), 2019-02-28
Supplement: MOESM5 [file 16517686]

ADDITIONAL TABLE C: Logistic regression model of the association of 24h-EC-SOFA sub-score with one-year outcome.

|                                          | Full Data          |             |        |
|------------------------------------------|--------------------|-------------|--------|
|                                          | One-year mortality |             |        |
|                                          | OR                 | 95% CI      | P      |
| Age (year)                               | 1.01               | 1.01 - 1.02 | < 0.01 |
| Physical status (dependent) <sup>1</sup> | 2.16               | 1.76 - 2.66 | < 0.01 |
| Respiration (point)                      | 1.18               | 1.12 - 1.25 | < 0.01 |
| Coagulation (point)                      | 1.09               | 1.00 - 1.18 | 0.04   |
| Liver (point)                            | 1.23               | 1.10 - 1.37 | < 0.01 |
| Renal (point)                            | 1.52               | 1.44 - 1.61 | < 0.01 |

All 24h-EC-SOFA sub-scores (cardiovascular, respiration, coagulation, liver, renal) were considered in a stepwise manner. Only sub-scores with independent predictive value were included in the final model.<sup>1</sup>Simplified WHO/ECOG-classification before cardiac arrest
