# Supplementary material for: Association of extracerebral organ failure with 1-year survival and healthcare-associated costs after cardiac arrest: an observational database study
Source: Springer Nature journal article supplement (doi:10.1186/s13054-019-2359-z), 2019-02-28
Supplement: MOESM6 [file 16517686]

ADDITIONAL TABLE D: Univariate analysis of all variables used in the multivariate models (logistic and linear regression) presented in other tables. The values presented in this table are for each variable alone without adjusting for other variables.

|                                | Full Data          |             |        |
|--------------------------------|--------------------|-------------|--------|
|                                | One-year mortality |             |        |
| Univariate logistic            | OR                 | 95% CI      | P      |
| Age (year)                     | 1.02               | 1.02 - 1.03 | < 0.01 |
| Physical status (dependent)    | 2.89               | 2.44 - 3.42 | < 0.01 |
| 24h-EC-SOFA (point)            | 1.15               | 1.13 - 1.17 | < 0.01 |
| 24h-SOFA (point)               | 1.21               | 1.19 - 1.23 | < 0.01 |
| Cardiovascular (point)         | 1.04               | 1.00 - 1.08 | 0.03   |
| Respiration (point)            | 1.16               | 1.11 - 1.21 | < 0.01 |
| Coagulation (point)            | 1.28               | 1.20 - 1.36 | < 0.01 |
| Liver (point)                  | 1.40               | 1.26 - 1.53 | < 0.01 |
| Central nervous system (point) | 1.32               | 1.27 - 1.36 | < 0.01 |
| Renal (point)                  | 1.62               | 1.54 - 1.70 | < 0.01 |

-----

Nested cohort

| Univariate logistic            | One-year mortality |             |        |
|--------------------------------|--------------------|-------------|--------|
|                                | OR                 | 95% CI      | P      |
| Age (year)                     | 1.02               | 1.02 - 1.03 | < 0.01 |
| Physical status (dependent)    | 3.19               | 2.08 - 4.91 | < 0.01 |
| 24h-EC-SOFA (point)            | 1.20               | 1.15 - 1.25 | < 0.01 |
| 24h-SOFA (point)               | 1.24               | 1.19 - 1.28 | < 0.01 |
| Cardiovascular (point)         | 1.08               | 0.99 - 1.19 | < 0.01 |
| Respiration (point)            | 1.21               | 1.10 - 1.34 | < 0.01 |
| Coagulation (point)            | 1.35               | 1.18 - 1.55 | < 0.01 |
| Liver (point)                  | 1.37               | 1.15 - 1.63 | < 0.01 |
| Central nervous system (point) | 1.25               | 1.11 - 1.42 | < 0.01 |
| Renal (point)                  | 1.61               | 1.47 - 1.77 | < 0.01 |
| Not shockable                  | 3.21               | 2.53 - 4.07 | < 0.01 |
| ROSC-delay (min)               | 1.02               | 1.01 - 1.03 | < 0.01 |
| Not witnessed                  | 1.83               | 1.27 - 2.64 | < 0.01 |

-----

Nested cohort

| Univariate logistic            | Poor neurologic outcome |             |        |
|--------------------------------|-------------------------|-------------|--------|
|                                | OR                      | 95% CI      | P      |
| Age (year)                     | 1.03                    | 1.02 - 1.03 | < 0.01 |
| Physical status (dependent)    | 4.04                    | 2.45 - 6.67 | < 0.01 |
| 24h-EC-SOFA (point)            | 1.17                    | 1.12 - 1.22 | < 0.01 |
| 24h-SOFA (point)               | 1.24                    | 1.19 - 1.29 | < 0.01 |
| Cardiovascular (point)         | 1.03                    | 0.94 - 1.13 | 0.57   |
| Respiration (point)            | 1.22                    | 1.10 - 1.35 | < 0.01 |
| Coagulation (point)            | 1.30                    | 1.13 - 1.50 | < 0.01 |
| Liver (point)                  | 1.29                    | 1.08 - 1.55 | < 0.01 |
| Central nervous system (point) | 1.31                    | 1.15 - 1.49 | < 0.01 |
| Renal (point)                  | 1.58                    | 1.43 - 1.75 | < 0.01 |
| Not shockable                  | 3.36                    | 2.61 - 4.32 | < 0.01 |
| ROSC-delay (min)               | 1.02                    | 1.00 - 1.03 | 0.02   |
| Not witnessed                  | 2.07                    | 1.38 - 3.10 | < 0.01 |

Full Data

|                                | Cost per day alive (€) |            |        |
|--------------------------------|------------------------|------------|--------|
|                                | B                      | 95% CI     | P      |
| Univariate linear              |                        |            |        |
| Age (year)                     | -1.6                   | -6.1 - 3.0 | 0.50   |
| Physical status (dependent)    | 110                    | -64 - 290  | 0.21   |
| 24h-EC-SOFA (point)            | 170                    | 150 - 190  | < 0.01 |
| 24h-SOFA (point)               | 170                    | 150 - 180  | < 0.01 |
| Cardiovascular (point)         | 140                    | 97 - 190   | < 0.01 |
| Respiration (point)            | 150                    | 94 - 200   | < 0.01 |
| Coagulation (point)            | 420                    | 355 - 490  | < 0.01 |
| Liver (point)                  | 240                    | 140 - 340  | < 0.01 |
| Central nervous system (point) | 150                    | 110 - 190  | < 0.01 |
| Renal (point)                  | 430                    | 390 - 480  | < 0.01 |

-----

Nested cohort

|                                | Cost per day alive (€) |            |        |
|--------------------------------|------------------------|------------|--------|
|                                | B                      | 95% CI     | P      |
| Univariate linear              |                        |            |        |
| Age (year)                     | 10                     | 0.40 - 20  | 0.04   |
| Physical status (dependent)    | 420                    | -81 - 920  | 0.10   |
| 24h-EC-SOFA (point)            | 280                    | 230 - 320  | < 0.01 |
| 24h-SOFA (point)               | 240                    | 200 - 270  | < 0.01 |
| Cardiovascular (point)         | 200                    | 87 - 320   | < 0.01 |
| Respiration (point)            | 240                    | 121 - 370  | < 0.01 |
| Coagulation (point)            | 560                    | 400 - 720  | < 0.01 |
| Liver (point)                  | 410                    | 200 - 610  | < 0.01 |
| Central nervous system (point) | 110                    | -51 - 260  | 0.18   |
| Renal (point)                  | 670                    | 570 - 760  | < 0.01 |
| Not shockable                  | 1000                   | 730 - 1300 | < 0.01 |
| ROSC-delay (min)               | 22                     | 10 - 33    | < 0.01 |
| Not witnessed                  | 210                    | -250 - 670 | 0.38   |

-----

Full Data

| Univariate linear                 | Total costs in one-year survivors<br>(1000€) |        |        | P      |
|-----------------------------------|----------------------------------------------|--------|--------|--------|
|                                   | B                                            | 95% CI |        |        |
| Age (year)                        | -0.74                                        | -0.95  | - 0.54 | < 0.01 |
| Physical status<br>(dependent)    | 11                                           | 0.90   | - 22   | 0.03   |
| 24h-EC-SOFA<br>(point)            | 4.2                                          | 3.1    | - 5.2  | < 0.01 |
| 24h-SOFA<br>(point)               | 3.2                                          | 2.3    | - 4.1  | < 0.01 |
| Cardiovascular<br>(point)         | 3.4                                          | 1.3    | - 5.6  | < 0.01 |
| Respiration<br>(point)            | 7.4                                          | 5.0    | - 9.9  | < 0.01 |
| Coagulation<br>(point)            | 5.4                                          | 1.8    | - 9.1  | < 0.01 |
| Liver (point)                     | 5.4                                          | -0.29  | - 11   | 0.06   |
| Central nervous<br>system (point) | 1.9                                          | -0.04  | - 3.8  | 0.06   |
| Renal (point)                     | 8.3                                          | 5.5    | - 11   | < 0.01 |

-----

Nested cohort

|                                   | Total costs in one-year survivors<br>(1000€) |        |         | P      |
|-----------------------------------|----------------------------------------------|--------|---------|--------|
|                                   | B                                            | 95% CI |         |        |
| Univariate linear                 |                                              |        |         |        |
| Age (year)                        | -0.28                                        | -0.62  | - 0.058 | 0.10   |
| Physical status<br>(dependent)    | 22                                           | -1.6   | - 45    | 0.07   |
| 24h-EC-SOFA<br>(point)            | 7.1                                          | 5.2    | - 9.0   | < 0.01 |
| 24h-SOFA<br>(point)               | 4.2                                          | 2.5    | - 5.8   | < 0.01 |
| Cardiovascular<br>(point)         | 1.0                                          | -3.2   | - 5.2   | 0.48   |
| Respiration<br>(point)            | 6.6                                          | 2.4    | - 11    | < 0.01 |
| Coagulation<br>(point)            | 11                                           | 4.7    | - 18    | < 0.01 |
| Liver (point)                     | 17                                           | 7.9    | - 25    | < 0.01 |
| Central nervous<br>system (point) | -4.4                                         | -9.7   | - 0.98  | 0.11   |
| Renal (point)                     | 20                                           | 15     | - 24    | < 0.01 |
| Not shockable                     | 21                                           | 9.9    | - 32    | < 0.01 |
| ROSC-delay<br>(min)               | -0.19                                        | -0.66  | - 0.28  | 0.43   |
| Not witnessed                     | -23                                          | -41    | - -4.8  | < 0.01 |
