# Supplementary material for: Association of extracerebral organ failure with 1-year survival and healthcare-associated costs after cardiac arrest: an observational database study
Source: Springer Nature journal article supplement (doi:10.1186/s13054-019-2359-z), 2019-02-28
Supplement: MOESM7 [file 16517686]

## ECPS

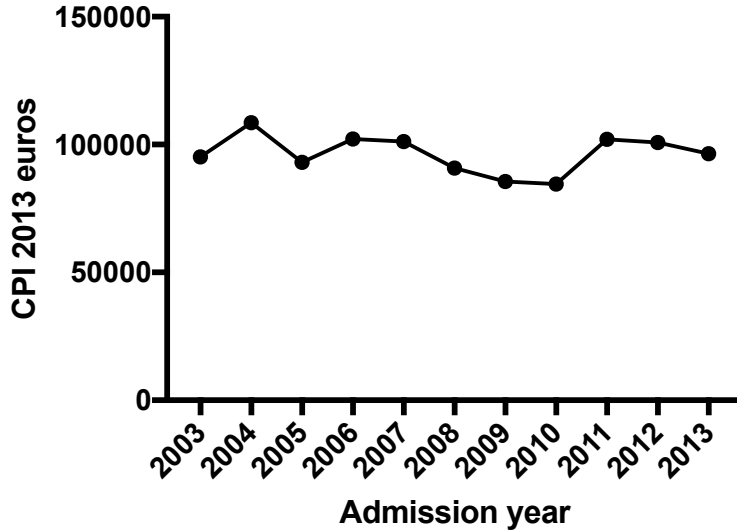

Additional Figure C: Effective cost per survivor (ECPS) stratified by admission year in the full data. ECPS was calculated by dividing the sum of total costs for all patients with the number of survivors for each year.
