# Supplementary material for: Association of extracerebral organ failure with 1-year survival and healthcare-associated costs after cardiac arrest: an observational database study
Source: Springer Nature journal article supplement (doi:10.1186/s13054-019-2359-z), 2019-02-28
Supplement: MOESM8 [file 16517686]

## Healthcare costs per one-year survivor

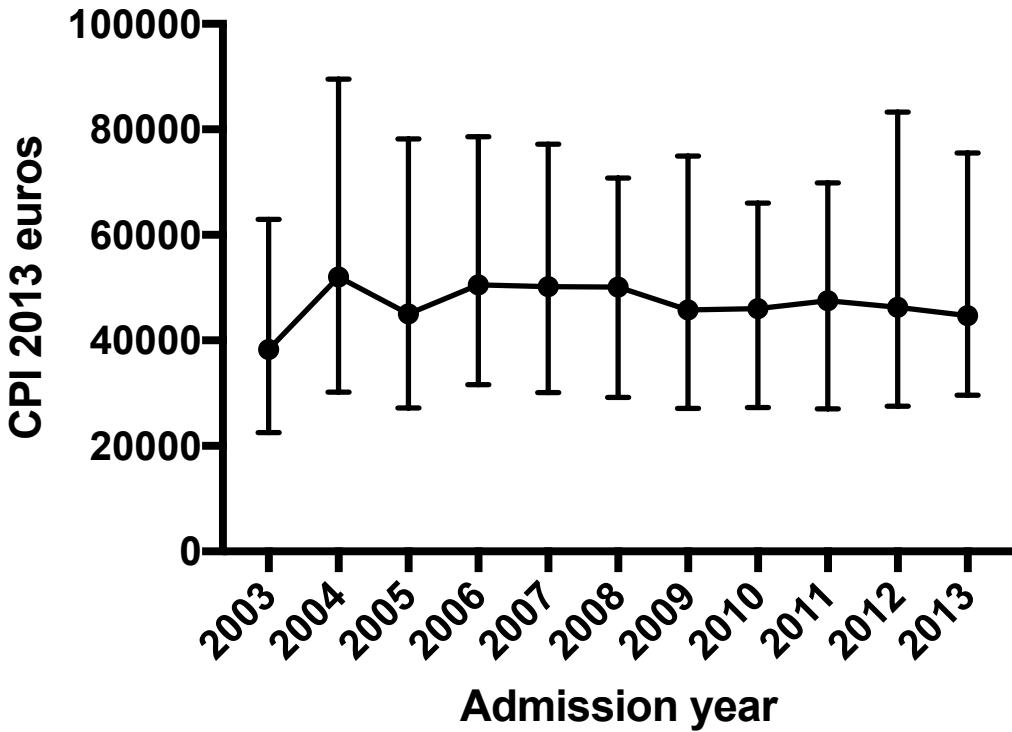

## Healthcare costs per one-year non-survivor

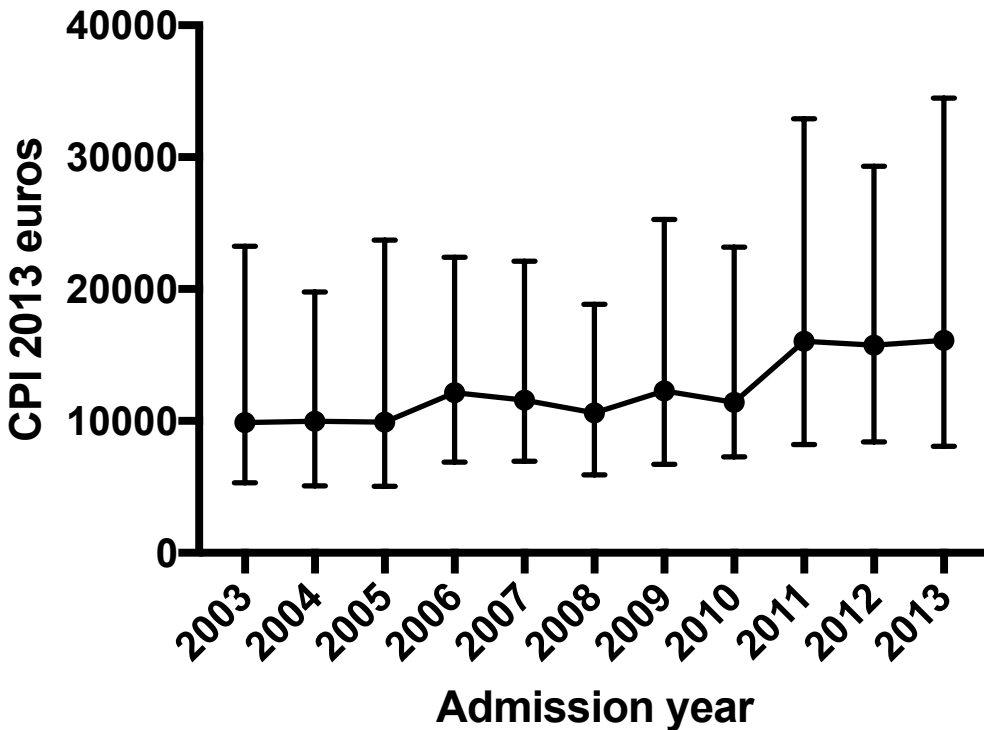

Additional Figure D: Total healthcare-associated costs recorded during the year after cardiac arrest stratified by admission year in the full data. Upper panel, one-year survivors; lower panel, one-year non-survivors. Median with interquartile ratio (IQR, whiskers) is presented.
