# Supplementary material for: Association of extracerebral organ failure with 1-year survival and healthcare-associated costs after cardiac arrest: an observational database study
Source: Springer Nature journal article supplement (doi:10.1186/s13054-019-2359-z), 2019-02-28
Supplement: MOESM9 [file 16517686]

ADDITIONAL Table E: Linear model of the association of 24h-EC-SOFA sub-score with one-year healthcare-associated costs per day alive.

|                                          | Cost per day alive (€) |        |       |        |
|------------------------------------------|------------------------|--------|-------|--------|
|                                          | Full data              |        |       |        |
|                                          | B                      | 95% CI |       | P      |
| Age (year)                               | -4.8                   | -9.2   | -0.34 | 0.04   |
| Physical status (dependent) <sup>1</sup> | -43                    | -210   | 130   | 0.63   |
| Respiration (point)                      | 120                    | 61     | 170   | < 0.01 |
| Coagulation (point)                      | 300                    | 230    | 370   | < 0.01 |
| Cardiovascular (point)                   | 90                     | 41     | 140   | < 0.01 |
| Renal (point)                            | 400                    | 350    | 440   | < 0.01 |

All 24h-EC-SOFA sub-scores (cardiovascular, respiration, coagulation, liver, renal) were considered in a stepwise manner. Only sub-scores with independent predictive value were included in the final model. <sup>1</sup>Simplified WHO/ECOG-classification before cardiac arrest
