# Supplementary material for: Association of extracerebral organ failure with 1-year survival and healthcare-associated costs after cardiac arrest: an observational database study
Source: Springer Nature journal article supplement (doi:10.1186/s13054-019-2359-z), 2019-02-28
Supplement: MOESM10 [file 16517686]

ADDITIONAL Table F: Linear model of the association of 24h-EC-SOFA sub-score with one-year healthcare-associated costs (per 1000€) in one-year survivors.

|                                             | Total costs in one-year survivors<br>(1000€) |              |        |
|---------------------------------------------|----------------------------------------------|--------------|--------|
|                                             | Full data                                    |              |        |
|                                             | B                                            | 95% CI       | P      |
| Age (year)                                  | -0.88                                        | -1.1 - -0.67 | < 0.01 |
| Physical status<br>(dependent) <sup>1</sup> | 13                                           | 2.8 - 24     | 0.01   |
| Respiration<br>(point)                      | 7.3                                          | 4.8 - 9.8    | < 0.01 |
| Coagulation<br>(point)                      | 4.6                                          | 1.0 - 8.3    | 0.01   |
| Renal (point)                               | 7.9                                          | 5.0 - 11     | < 0.01 |

All 24h-EC-SOFA sub-scores (cardiovascular, respiration, coagulation, liver, renal) were considered in a stepwise manner. Only sub-scores with independent predictive value were included in the final model. <sup>1</sup>Simplified WHO/ECOG-classification before cardiac arrest
