# Supplementary material for: Association of extracerebral organ failure with 1-year survival and healthcare-associated costs after cardiac arrest: an observational database study
Source: Springer Nature journal article supplement (doi:10.1186/s13054-019-2359-z), 2019-02-28
Supplement: MOESM11 [file 16517686]

ADDITIONAL TABLE G: Logistic regression model of the association of 24h-EC-SOFA sub-score with one-year outcome in the nested cohort.

|                                          | Nested cohort      |             |        |                                      |             |        |
|------------------------------------------|--------------------|-------------|--------|--------------------------------------|-------------|--------|
|                                          | One-year mortality |             |        | Poor neurologic outcome <sup>1</sup> |             |        |
|                                          | OR                 | 95% CI      | P      | OR                                   | 95% CI      | P      |
| Age (year)                               | 1.03               | 1.02 - 1.04 | < 0.01 | 1.03                                 | 1.02 - 1.04 | < 0.01 |
| Physical status (dependent) <sup>2</sup> | 2.39               | 1.38 - 4.14 | < 0.01 | 3.27                                 | 1.75 - 6.11 | < 0.01 |
| Not shockable <sup>3</sup>               | 3.09               | 2.26 - 4.22 | < 0.01 | 3.41                                 | 2.46 - 4.74 | < 0.01 |
| ROSC delay (min) <sup>4</sup>            | 1.05               | 1.03 - 1.07 | < 0.01 | 1.05                                 | 1.03 - 1.07 | < 0.01 |
| Not witnessed <sup>5</sup>               | 1.79               | 1.14 - 2.82 | 0.01   | 2.00                                 | 1.22 - 3.26 | < 0.01 |
| Respiration (point)                      | 1.16               | 1.02 - 1.32 | 0.03   | 1.17                                 | 1.02 - 1.33 | 0.02   |
| Renal (point)                            | 1.50               | 1.32 - 1.70 | < 0.01 | 1.42                                 | 1.25 - 1.63 | < 0.01 |

All 24h-EC-SOFA sub-scores (cardiovascular, respiration, coagulation, liver, renal) were considered in a stepwise manner. Only sub-scores with independent predictive value were included in the final model. <sup>1</sup>Cerebral Performance Category (CPC) 3-5 one year after cardiac arrest; <sup>2</sup>Simplified WHO/ECOG-classification before cardiac arrest; <sup>3</sup>Not shockable, initial cardiac rhythm during resuscitation not shockable (asystole/pulseless electrical activity); <sup>4</sup>ROSC delay, time from collapse to return of spontaneous circulation; <sup>5</sup>Not witnessed, collapse not witnessed
