# Supplementary material for: Association of extracerebral organ failure with 1-year survival and healthcare-associated costs after cardiac arrest: an observational database study
Source: Springer Nature journal article supplement (doi:10.1186/s13054-019-2359-z), 2019-02-28
Supplement: MOESM12 [file 16517686]

ADDITIONAL TABLE H: Logistic regression model of the association of 24h-EC-SOFA score with one-year outcome in the out-of-hospital cardiac arrest (OHCA) and in-hospital cardiac arrest (IHCA) subgroups of the nested cohort.

|                                          | OHCA               |             |        |                                      |             |        |
|------------------------------------------|--------------------|-------------|--------|--------------------------------------|-------------|--------|
|                                          | One-year mortality |             |        | Poor neurologic outcome <sup>1</sup> |             |        |
|                                          | OR                 | 95% CI      | P      | OR                                   | 95% CI      | P      |
| Age (year)                               | 1.04               | 1.02 - 1.05 | < 0.01 | 1.04                                 | 1.02 - 1.05 | < 0.01 |
| Physical status (dependent) <sup>2</sup> | 2.23               | 0.97 - 5.13 | 0.06   | 3.36                                 | 1.32 - 8.55 | 0.01   |
| Not shockable <sup>3</sup>               | 4.26               | 2.80 - 6.50 | < 0.01 | 4.67                                 | 2.98 - 7.30 | < 0.01 |
| ROSC delay (min) <sup>4</sup>            | 1.06               | 1.04 - 1.08 | < 0.01 | 1.07                                 | 1.04 - 1.09 | < 0.01 |
| Not witnessed <sup>5</sup>               | 1.43               | 0.84 - 2.45 | 0.19   | 1.61                                 | 0.92 - 2.83 | 0.10   |
| 24h-EC-SOFA (point)                      | 1.20               | 1.10 - 1.31 | < 0.01 | 1.15                                 | 1.05 - 1.25 | < 0.01 |

<sup>1</sup>Cerebral Performance Category (CPC) 3-5 one year after cardiac arrest; <sup>2</sup>Simplified WHO/ECOG-classification before cardiac arrest; <sup>3</sup>Not shockable, initial cardiac rhythm during resuscitation not shockable (asystole/pulseless electrical activity); <sup>4</sup>ROSC delay, time from collapse to return of spontaneous circulation; <sup>5</sup>Not witnessed, collapse not witnessed

## IHCA

|                                          | One-year mortality |              |        | Poor neurologic outcome <sup>1</sup> |              |        |
|------------------------------------------|--------------------|--------------|--------|--------------------------------------|--------------|--------|
|                                          | OR                 | 95% CI       | P      | OR                                   | 95% CI       | P      |
| Age (year)                               | 1.02               | 1.00 - 1.04  | 0.02   | 1.02                                 | 1.00 - 1.04  | 0.07   |
| Physical status (dependent) <sup>2</sup> | 2.84               | 1.37 - 5.89  | < 0.01 | 3.50                                 | 1.52 - 8.04  | < 0.01 |
| Not shockable <sup>3</sup>               | 2.58               | 1.57 - 4.24  | < 0.01 | 2.79                                 | 1.66 - 4.68  | < 0.01 |
| ROSC delay (min) <sup>4</sup>            | 1.03               | 1.00 - 1.06  | 0.04   | 1.03                                 | 1.00 - 1.06  | 0.08   |
| Not witnessed <sup>5</sup>               | 4.65               | 1.63 - 13.24 | < 0.01 | 5.65                                 | 1.59 - 20.02 | < 0.01 |
| 24h-EC-SOFA                              | 1.15               | 1.06 - 1.24  | < 0.01 | 1.11                                 | 1.03 - 1.21  | < 0.01 |
