# Supplementary material for: Association of extracerebral organ failure with 1-year survival and healthcare-associated costs after cardiac arrest: an observational database study
Source: Springer Nature journal article supplement (doi:10.1186/s13054-019-2359-z), 2019-02-28
Supplement: MOESM13 [file 16517686]

ADDITIONAL Table I: Linear model of the association of 24h-EC-SOFA score with one-year healthcare associated costs per day alive in the out-of-hospital cardiac arrest (OHCA) and in-hospital cardiac arrest (IHCA) subgroups of the nested cohort.

|                                          | Cost per day alive (€) |            |        |      |             |        |
|------------------------------------------|------------------------|------------|--------|------|-------------|--------|
|                                          | OHCA                   |            |        | IHCA |             |        |
|                                          | B                      | 95% CI     | P      | B    | 95% CI      | P      |
| Age (year)                               | 12                     | 1.6 - 23   | 0.02   | -9.1 | -26 - 8.1   | 0.30   |
| Physical status (dependent) <sup>1</sup> | -15                    | -690 - 660 | 0.97   | 300  | -370 - 980  | 0.38   |
| Not shockable <sup>2</sup>               | 1000                   | 670 - 1300 | < 0.01 | 410  | -94 - 910   | 0.11   |
| ROSC delay (min) <sup>3</sup>            | 38                     | 24 - 53    | < 0.01 | 47   | 18 - 75     | < 0.01 |
| Not witnessed <sup>4</sup>               | 32                     | -410 - 480 | 0.89   | 530  | -310 - 1400 | 0.21   |
| 24h-EC-SOFA (point)                      | 210                    | 150 - 280  | < 0.01 | 200  | 120 - 270   | < 0.01 |

<sup>1</sup>Simplified WHO/ECOG-classification before cardiac arrest; <sup>2</sup>Not shockable, initial cardiac rhythm during resuscitation not shockable (asystole/pulseless electrical activity); <sup>3</sup>ROSC delay, time from collapse to return of spontaneous circulation; <sup>4</sup>Not witnessed, collapse not witnessed
