# Supplementary material for: Association of extracerebral organ failure with 1-year survival and healthcare-associated costs after cardiac arrest: an observational database study
Source: Springer Nature journal article supplement (doi:10.1186/s13054-019-2359-z), 2019-02-28
Supplement: MOESM14 [file 16517686]

ADDITIONAL Table J: Linear model of the association of 24h-EC-SOFA score with one-year healthcare associated costs (per 1000€) in one-year survivors in the out-of-hospital cardiac arrest (OHCA) and in-hospital cardiac arrest (IHCA) subgroups of the nested cohort.

|                                          | Total costs in one-year survivors (1000€) |              |      |      |              |        |
|------------------------------------------|-------------------------------------------|--------------|------|------|--------------|--------|
|                                          | OHCA                                      |              |      | IHCA |              |        |
|                                          | B                                         | 95% CI       | P    | B    | 95% CI       | P      |
| Age (year)                               | -0.093                                    | -0.42 - 0.24 | 0.58 | -1.3 | -2.3 - -0.31 | 0.01   |
| Physical status (dependent) <sup>1</sup> | -7.4                                      | -35 - 20     | 0.60 | 63   | 11 - 110     | 0.02   |
| Not shockable <sup>2</sup>               | 7.8                                       | -4.5 - 20    | 0.22 | 16   | -13 - 44     | 0.28   |
| ROSC delay (min) <sup>3</sup>            | 0.37                                      | -0.10 - 0.84 | 0.12 | .39  | -1.2 - 1.9   | 0.62   |
| Not witnessed <sup>4</sup>               | -13                                       | -28 - 2.5    | 0.10 | -69  | -150 - 11    | 0.09   |
| 24h-EC-SOFA (point)                      | 2.5                                       | 0.20 - 4.8   | 0.03 | 11   | 5.6 - 16     | < 0.01 |

<sup>1</sup>Simplified WHO/ECOG-classification before cardiac arrest; <sup>2</sup>Not shockable, initial cardiac rhythm during resuscitation not shockable (asystole/pulseless electrical activity); <sup>3</sup>ROSC delay, time from collapse to return of spontaneous circulation; <sup>4</sup>Not witnessed, collapse not witnessed
